# Supplementary material for: Genetic engineering: a decade of disagreement
Source: Royal Society of Chemistry journal article supplement (doi:10.1039/c2dt00018k), 2006-01-01
Supplement: c2dt00018k.pdf [file c2dt00018k.pdf]

# A Novel Polyoxovanadium Borate Incorporating an Organicamine Ligand: Synthesis and Structure of $[V_{12}B_{16}O_{50}(OH)_7(en)]^{7-}$

Yan-Qiong Sun,<sup>a</sup> Guang-Man Li,<sup>a</sup> and Yi-Ping Chen<sup>\*a</sup>

<sup>a</sup> College of Chemistry and Chemical Engineering, Department of Chemistry, Fuzhou University, Fuzhou, Fujian 350108, P. R. China. Fax: +86-591- 22866340; E-mail: ypchen007@sina.com

## Electronic Supplementary Information:

### physical measurements

All analytical reagent grade chemicals were commercially purchased and used without purification. The elemental analyses of C, H, and N were performed with an Elementar Vario EL III elemental analyzer. The IR spectra were recorded with a Perkin-Elmer Spectrum 2000 FT-IR spectrometer in the range of 400-4000  $\text{cm}^{-1}$  using the KBr pellet technique. Thermogravimetric(TG) analyses were conducted on a Perkin-Elmer TGA7 Thermal analyzer in an  $\text{N}_2$  atmosphere with a heating rate of 10  $^\circ\text{C}/\text{min}$  from 25  $^\circ\text{C}$  to 800  $^\circ\text{C}$ .

In order to obtain the 2D IR correlation spectra, a series of dynamic IR spectra were recorded in the range 4000–400  $\text{cm}^{-1}$  on a Perkin-Elmer FT-IR spectrum 2000 spectrometers using KBr pellets. The temperature variation was controlled by a Portable programmable temperature controller (Model 50–886, Love Control Corporation) from 50 to 120  $^\circ\text{C}$  at intervals of 10 $^\circ\text{C}$ . The magnetic intensity variation was controlled by a homemade magnetic intensity controller from 5 to 50mT at intervals of 5mT. Before 2D calculation, each spectrum was smoothed

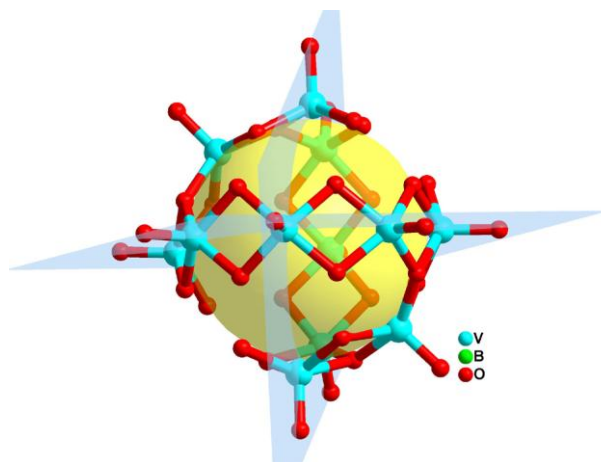

**Figure S1.**  $V_{12}$  cage cluster with two semi-circles of five *trans* edge-sharing  $\text{VO}_5$  square pyramids bridged by two additional  $\text{VO}_5$  units.

The contorted  $V_{12}$  ring is composed of two semi-circles of five *trans* edge-sharing  $\text{VO}_5$  square pyramids bridged by two additional  $\text{VO}_5$  units (Fig 2a). The dihedral angles between the planes of the two semi-circles is  $84.58^\circ$ . The dodecavanadate ring in **1** is a closed 12-membered vanadate

ring but not planar

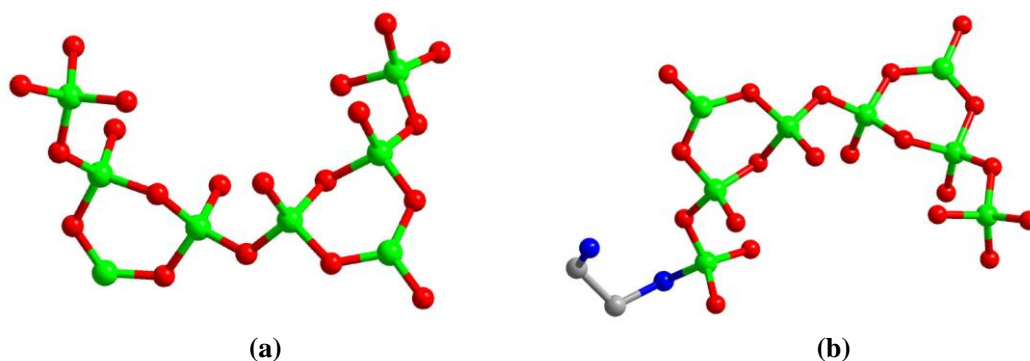

**Figure S2.** (a) Ball and stick presentation of  $[\text{B}_8\text{O}_{17}(\text{OH})_3(\text{en})]^{13-}$  cluster. (b) Ball and stick presentation of  $[\text{B}_8\text{O}_{17}(\text{OH})_4]^{14-}$  cluster.

According to the classification of polyborate anions by Heller, Christ, and Clark, the shorthand notation for this oxo boron cluster is “8: [2 $\Delta$ +6T]”, where the specified number is the number of boron atoms in the isolate cluster, and the symbols  $\Delta$  and T mean triangle and tetrahedron, respectively.

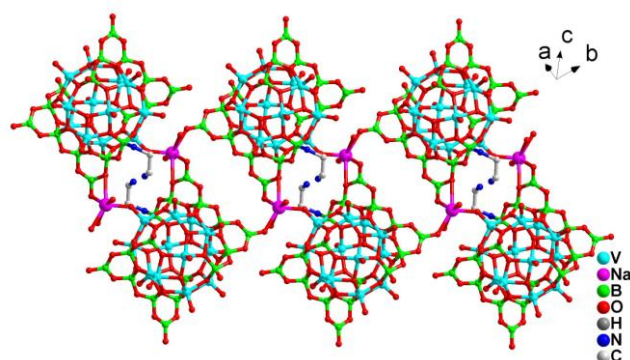

**Figure S3.** Ball and stick presentation of 1D anion dual chain bridged by  $\text{Na}^+$  ions running along the [1-10] direction.

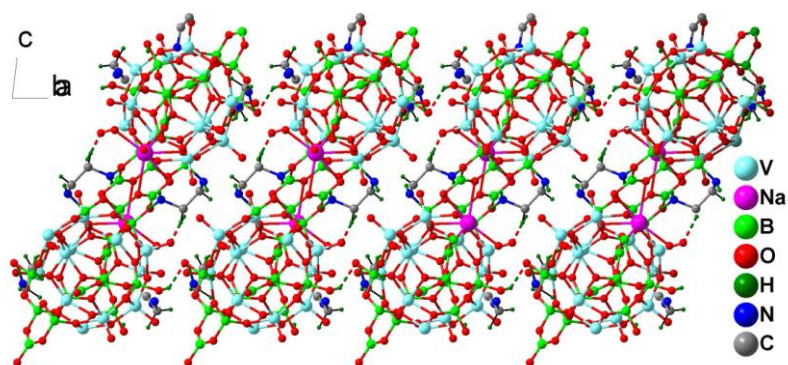

**Figure S4.** 2D supramolecular layer constructed by O-H $\cdots$ O hydrogen bonds.

The uncoordinated en molecules as structure-directing agents are accommodated in the free voids of **1** and are interacted to the  $\text{V}_{12}\text{B}_{16}$  clusters by O-H $\cdots$ O H-bonds, then the 1D dual chains are further linked to 2D layer

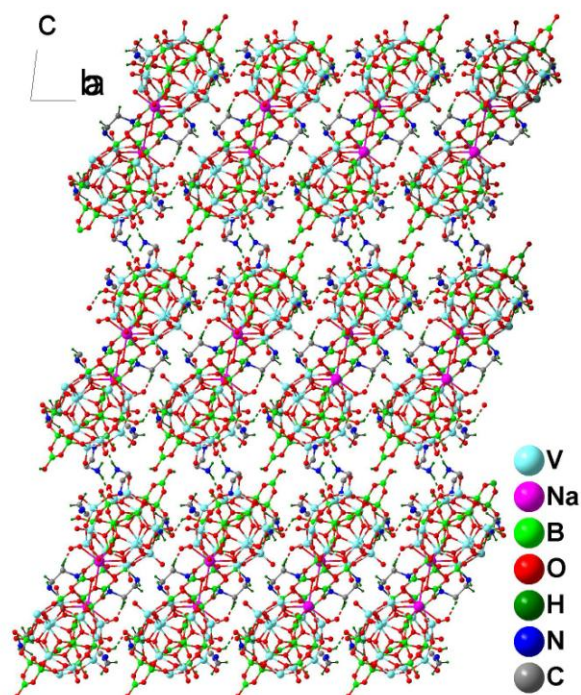

**Figure S5.** The dinuclear cluster ( $\text{Dy}_2$ ) units containing two Dy atoms and two  $\text{SO}_4^{2-}$  anions. Atoms having “A” in their labels are symmetry-generated. A: -x, -y, -z.

A pair of central-symmetry Dy ions are bridged by two  $\mu_2$ -O bridges of two  $\text{SO}_4^{2-}$  anions, forming a  $[\text{Dy}_2\text{O}_2]$  rhombic dimeric cluster unit.

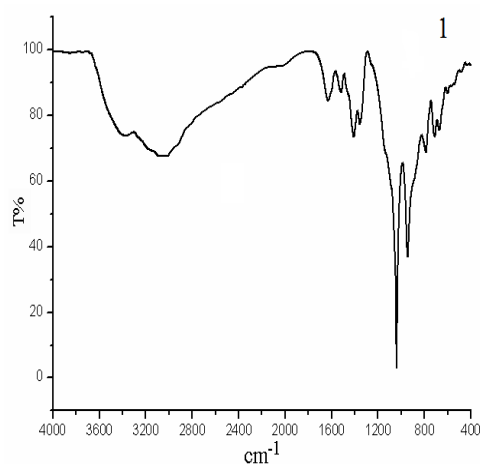

**Figure S6.** IR spectra of **1**.

**Table 1.** The IR vibration frequencies ( $\text{cm}^{-1}$ ) of compound **1**

| Vibration assignment           | Vibration frequencies ( $\text{cm}^{-1}$ ) |
|--------------------------------|--------------------------------------------|
| <i>vas</i> (V=O <sub>t</sub> ) | 953                                        |
| <i>vas</i> (V-O <sub>μ</sub> ) | 787, 711                                   |
| <i>vs</i> (V-O <sub>μ</sub> )  | 672                                        |
| <i>vas</i> (B <sup>a</sup> -O) | 1039                                       |
| <i>vas</i> (B <sup>b</sup> -O) | 1356                                       |
| $\delta$ (CH <sub>2</sub> )    | 1458                                       |
| $\delta$ (NH <sub>3</sub> )    | 1518                                       |
| $\delta$ (OH)                  | 1629                                       |
| $\nu$ (N-H)                    | 3081                                       |

|                   |      |
|-------------------|------|
| $\nu(\text{O-H})$ | 3395 |
|-------------------|------|

a: tetrahedron coordinated B; b: triangle coordinated B.

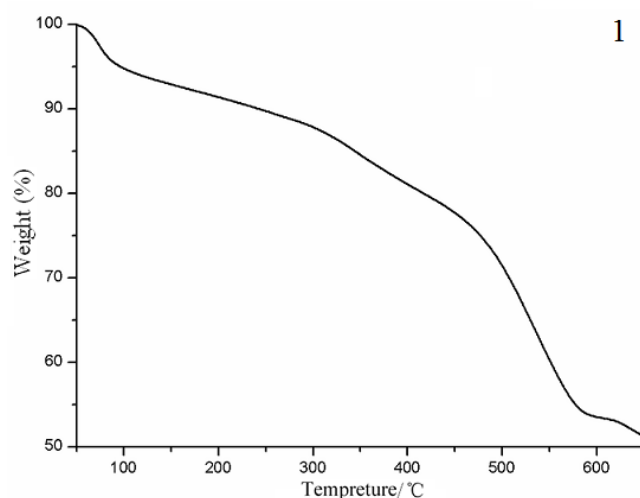

**Figure S7** TG curves for **1**.

The thermal stability of **1** was examined by TGA in a dry nitrogen atmosphere from 40 to 700°C. The TG curves of **1** exhibit two-step primary weight loss processes for a crystalline sample. The initial weight loss of 5.86% in the range of 50–90°C corresponds to the release of sixteen lattice water molecules (calc. 6.57%). The second weight loss of 31.32% is observed from 90 to 570°C, and is attributed to the removal of four coordinated water molecules, eight en molecules, two  $\text{B}_8\text{O}_{20}(\text{en})$  per formula unit (calc. 32.40%).

**Table 2** The BVS of Vanadium and Oxygen for **1**.

| Atoms | V1    | V2    | V3    | V4    | V5    | V6    | V7    | V8    | V9    | V10   |
|-------|-------|-------|-------|-------|-------|-------|-------|-------|-------|-------|
| BVS   | 4.272 | 4.314 | 4.396 | 4.354 | 4.271 | 4.377 | 4.269 | 4.358 | 4.347 | 4.413 |
| Atoms | V11   | V12   | O37   | O40   | O44   | O47   | O48   | O51   | O55   |       |
| BVS   | 4.32  | 4.376 | 0.777 | 0.962 | 0.974 | 0.721 | 0.783 | 1.199 | 1.057 |       |

**Table 3** Parameters of hydrogen bonds for **1**.

| D-H...A                    | d(D-H) (Å) | d(H...A) (Å) | d(D...A) (Å) | <DHA(°) |
|----------------------------|------------|--------------|--------------|---------|
| O37-H1...O47 <sup>a</sup>  | 0.882      | 1.902        | 2.762        | 164.48  |
| O40-H2...O50 <sup>b</sup>  | 0.878      | 1.811        | 2.685        | 173.78  |
| O44-H3...O43 <sup>c</sup>  | 0.881      | 1.996        | 2.724        | 139.03  |
| O51-H6...O39 <sup>d</sup>  | 0.883      | 1.940        | 2.780        | 158.39  |
| O61-H7...O54               | 0.850      | 2.035        | 2.793        | 148.09  |
| O62-H9...O52 <sup>e</sup>  | 0.850      | 1.979        | 2.782        | 157.24  |
| O62-H10...O55              | 0.850      | 1.931        | 2.770        | 168.73  |
| O64-H13...O60 <sup>d</sup> | 0.850      | 1.936        | 2.720        | 152.75  |
| O65-H15...O36 <sup>f</sup> | 0.850      | 2.028        | 2.831        | 157.18  |
| O65-H16...O8               | 0.850      | 1.978        | 2.816        | 168.46  |
| O66-H18...O41 <sup>c</sup> | 0.850      | 2.047        | 2.888        | 169.91  |
| O67-H20...O8               | 0.850      | 2.032        | 2.866        | 166.77  |
| O68-H21...O44 <sup>c</sup> | 0.850      | 2.150        | 2.959        | 158.87  |
| O69-H23...O42              | 0.850      | 1.977        | 2.779        | 157.19  |
| O70-H25...O37              | 0.850      | 1.976        | 2.700        | 142.40  |

|                           |       |       |       |        |
|---------------------------|-------|-------|-------|--------|
| O70-H26...N8 <sup>b</sup> | 0.850 | 2.198 | 2.875 | 136.56 |
| N2-H30...O29 <sup>g</sup> | 1.110 | 1.911 | 2.870 | 142.14 |
| N3-H31...O37              | 0.886 | 2.282 | 2.880 | 124.66 |
| N3-H31...O32              | 0.886 | 2.341 | 2.997 | 130.82 |
| N7-H35...O69 <sup>h</sup> | 0.881 | 1.944 | 2.799 | 163.31 |
| N8-H36...O38 <sup>i</sup> | 0.886 | 1.796 | 2.677 | 172.41 |
| N9-H37...O2 <sup>f</sup>  | 0.917 | 1.913 | 2.819 | 169.10 |
| N9-H38...O48              | 0.924 | 1.782 | 2.699 | 170.93 |

a [ x+1, y, z ]; b [ x+1, y-1,z ]; c [ -x, -y, -z ]; d [ x-1, y+1, z]; e [ -x, -y+1, -z+1 ]; f [ -x, -y+1, -z ]; g [ -x+1, -y, -z+1 ]; h [ x, y+1, z ];  
i [ x-1, y+1, z ].
